# Supplementary material
Source: MDPI journal article supplement (https://www.mdpi.com/2227-9040/11/3/177)
Supplement: s1 [file s1]

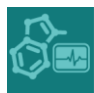

# Aggregation-Induced Emission-Active Iridium(III) Complexes for Sensing Picric Acid in Water

Ping He <sup>1</sup>, Yan Chen <sup>1</sup>, Xiao-Na Li <sup>2</sup>, Ying-Ying Yan <sup>1</sup> and Chun Liu <sup>1,\*</sup>

<sup>1</sup> State Key Laboratory of Fine Chemicals, Frontier Science Center for Smart Materials, School of Chemical Engineering, Dalian University of Technology, Dalian 116024, China

<sup>2</sup> School of Environmental Science and Technology, Key Laboratory of Industrial Ecology and Environmental Engineering (MOE), Dalian University of Technology, Liaoning 116024, China

\* Correspondence: cliu@dlut.edu.cn; Tel.: +86-411-84986182

## Contents

|                                                       |        |
|-------------------------------------------------------|--------|
| Phosphorescence decay curves of Ir1–Ir3               | S2     |
| Calculation of limits of detection (LOD) of Ir1–Ir3   | S2–S4  |
| Previously reported PA sensors                        | S5–S6  |
| The selectivity of Ir(III) complexes for detecting PA | S7     |
| <sup>1</sup> H NMR spectra and HRMS analysis          | S8     |
| NMR spectra, HRMS and FTIR spectra of Ir1–Ir3         | S9–S13 |

### 1. Phosphorescence decay curves of Ir1–Ir3

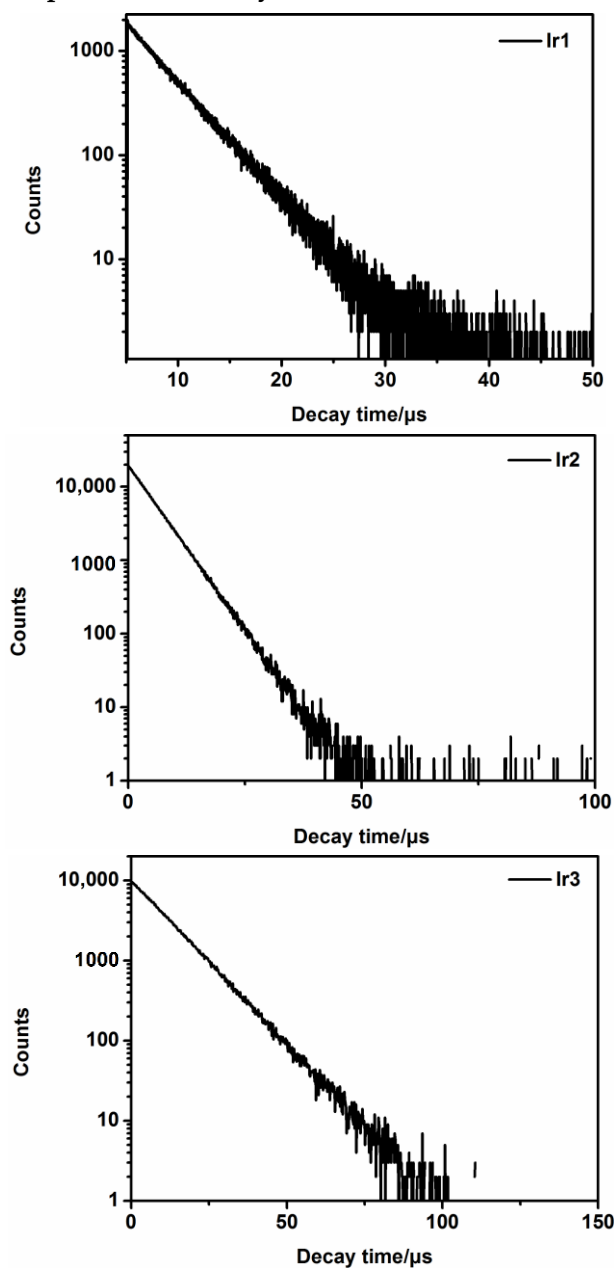

Figure S1. Phosphorescence decay curves of Ir1–Ir3 in deoxygenated CH<sub>2</sub>Cl<sub>2</sub>.

### 2. Calculation of limits of detection (LOD) of Ir1–Ir3

The limits of detection of Ir1, Ir2 and Ir3 were calculated according to the following equation  $LOD = 3\sigma/K$  ( $\sigma$  represents the standard deviation of the blank measurement,  $K$  represents the slope of the linear regression). The limits of detection of Ir1, Ir2 and Ir3 for PA were calculated to be 50.17, 4.64, and 2.52 nM, respectively.

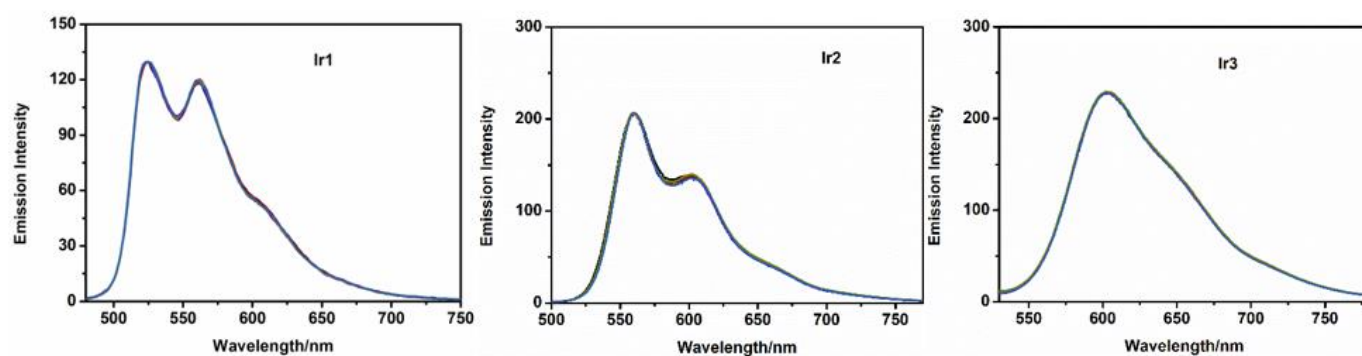

**Figure S2.** The emission spectra of **Ir1–Ir3** in  $\text{H}_2\text{O}/\text{CH}_3\text{CN}$  ( $v/v = 9:1$ ,  $10.0 \mu\text{M}$ ) for eleven times (blank measurement). The excitation wavelengths of **Ir1**, **Ir2** and **Ir3** were 400 nm, 400 nm and 440 nm, respectively.

The values of  $\sigma$  for **Ir1–Ir3** were calculated according to the following equation:

$$\sigma = \left[ \sum (X_i - X)^2 / (n-1) \right]^{0.5}$$

$X_i$  ( $i = 1, 2, 3 \dots 11$ ) represents the emission intensity of each test,  $X$  represents the mean value of the emission intensity,  $n$  represent the number of tests.

**Table S1.** The emission intensity of **Ir1** at 525 nm, **Ir2** at 560 nm and **Ir3** at 603 nm in eleven times in  $\text{H}_2\text{O}/\text{CH}_3\text{CN}$  ( $v/v = 9:1$ ,  $10.0 \mu\text{M}$ ).

| Complex    | $X_1$  | $X_2$  | $X_3$  | $X_4$  | $X_5$  | $X_6$  | $X_7$  | $X_8$  | $X_9$  | $X_{10}$ | $X_{11}$ | $X$    |
|------------|--------|--------|--------|--------|--------|--------|--------|--------|--------|----------|----------|--------|
| <b>Ir1</b> | 129.69 | 129.49 | 129.44 | 129.68 | 129.57 | 129.65 | 129.71 | 129.44 | 129.70 | 129.62   | 129.73   | 129.61 |
| <b>Ir2</b> | 206.63 | 206.51 | 206.74 | 206.46 | 206.43 | 206.59 | 206.60 | 206.65 | 206.32 | 206.52   | 206.54   | 206.55 |
| <b>Ir3</b> | 228.14 | 228.09 | 228.34 | 228.46 | 228.43 | 228.39 | 228.22 | 228.35 | 228.32 | 228.12   | 228.34   | 228.29 |

According to the above formula, the values of  $\sigma$  for **Ir1–Ir3** were calculated to be 0.1092, 0.1160, and 0.1282, respectively.

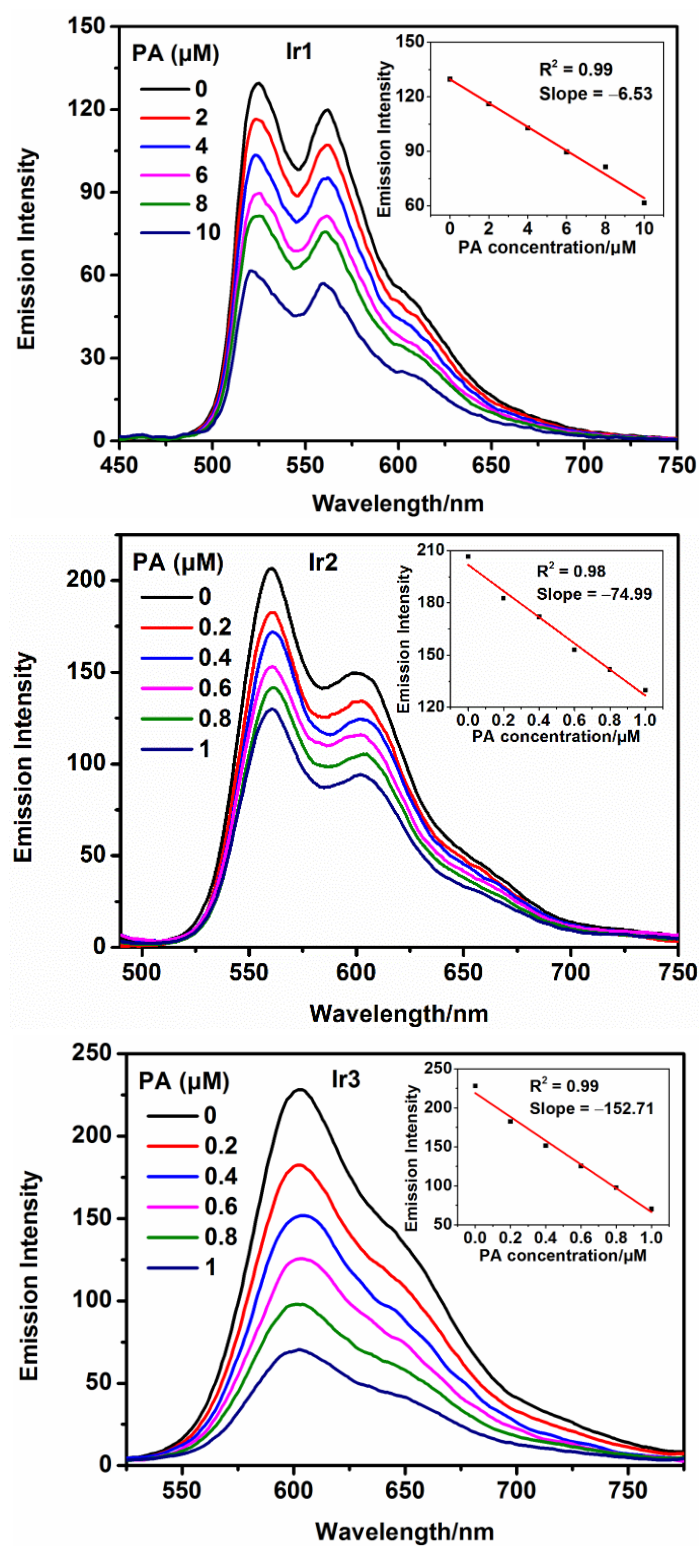

**Figure S3.** The emission spectra of Ir1, Ir2 and Ir3 at 10 μM after adding different concentrations of PA in H<sub>2</sub>O/CH<sub>3</sub>CN (*v/v* = 9:1). Insert: the slope of the linear regression. The excitation wavelengths of Ir1, Ir2 and Ir3 were 400 nm, 400 nm and 440 nm, respectively.

### 3. Previously reported PA sensors

**Table S2.** A comparison of solvent,  $K_{sv}$  and LOD for some sensors in detecting PA.

| Ir(III) complex                                                                     | Solvent                                  | $K_{sv}$                | LOD     | Reference |
|-------------------------------------------------------------------------------------|------------------------------------------|-------------------------|---------|-----------|
| 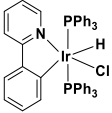   | H <sub>2</sub> O/THF ( $v/v = 9/1$ )     | 190000 M <sup>-1</sup>  | 65 nM   | [1]       |
|    | H <sub>2</sub> O/MeCN ( $v/v = 9/1$ )    | 3790000 M <sup>-1</sup> | 10 ppb  | [2]       |
|    | H <sub>2</sub> O/Acetone ( $v/v = 9/1$ ) | 52800 M <sup>-1</sup>   | —       | [3]       |
|    | H <sub>2</sub> O/MeCN ( $v/v = 9/1$ )    | 32000 M <sup>-1</sup>   | 0.15 μM | [4]       |
|   | Aqueous                                  | 353000 M <sup>-1</sup>  | 0.37 nM | [5]       |
|  | CH <sub>2</sub> Cl <sub>2</sub>          | 41338 M <sup>-1</sup>   | 2.52 μM | [6]       |
|  | H <sub>2</sub> O/THF ( $v/v = 9/1$ )     | 41000 M <sup>-1</sup>   | 2.40 μM | [7]       |
|  | H <sub>2</sub> O/MeCN ( $v/v = 9/1$ )    | 459000 M <sup>-1</sup>  | 4.64 nM | This work |
|  | H <sub>2</sub> O/MeCN ( $v/v = 9/1$ )    | 1960000 M <sup>-1</sup> | 2.52 nM | This work |

#### 4. The selectivity of Ir(III) complexes for detecting PA

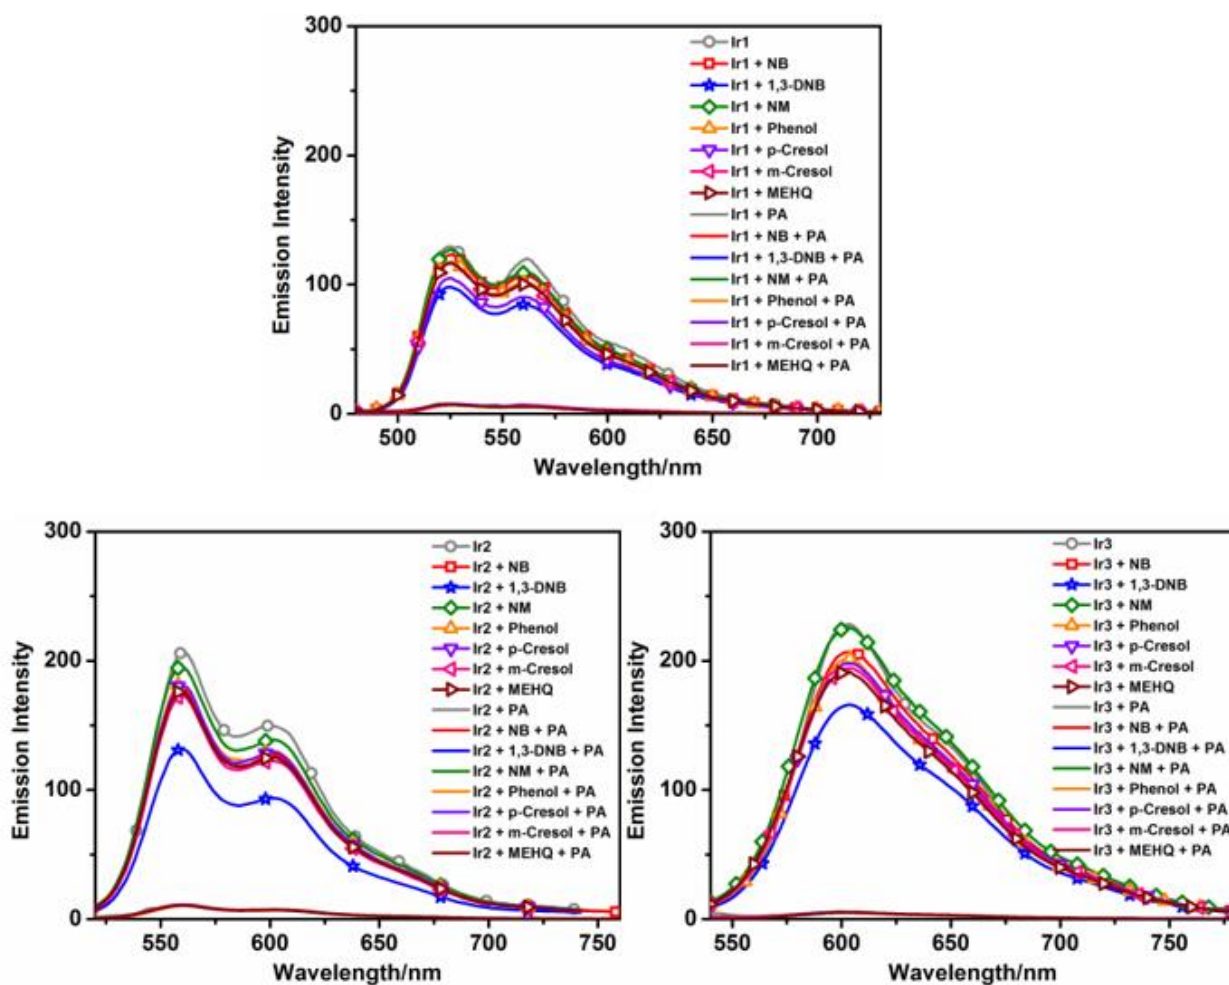

**Figure S4.** Emission spectra of Ir1–Ir3 (10  $\mu$ M) in presence of different analytes (8.0 equiv.) in H<sub>2</sub>O/CH<sub>3</sub>CN ( $v/v = 9:1$ ). The excitation wavelengths were 400 nm, 400 nm and 440 nm, respectively.

5.  $^1\text{H}$  NMR spectra and HRMS analysis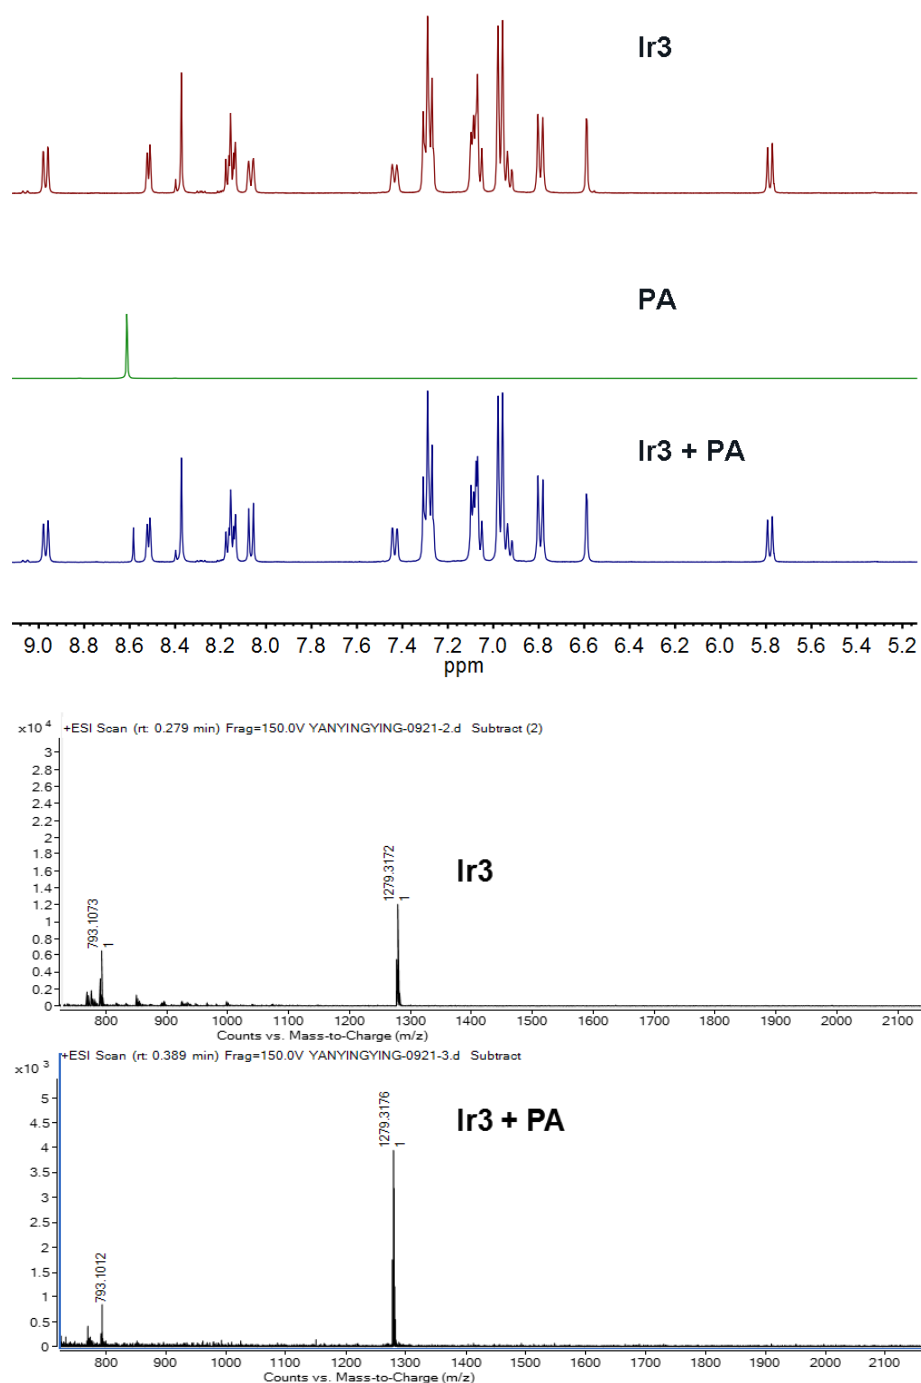

**Figure S5.**  $^1\text{H}$  NMR spectra (in  $\text{DMSO}-d_6$ ) and HRMS of the cationic portion of **Ir3** before and after addition of PA.

## 6. NMR spectra and HRMS of Ir1–Ir3

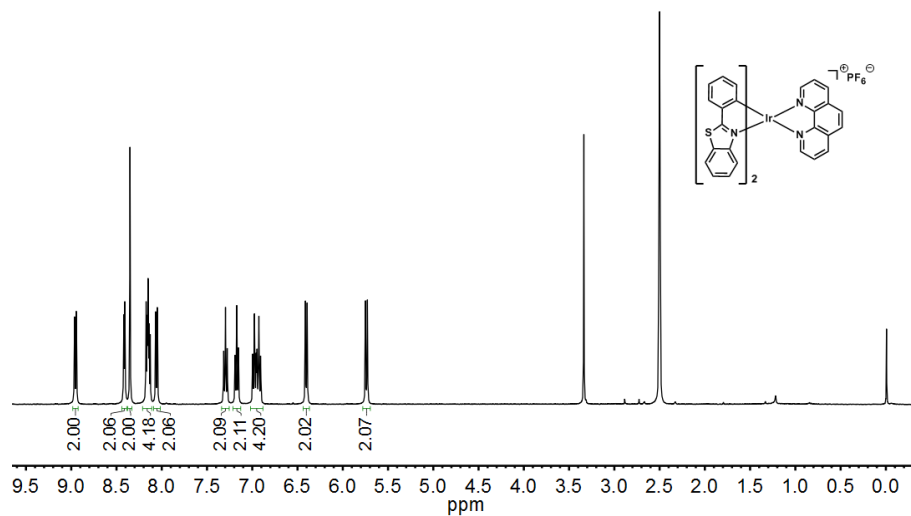Figure S6.  $^1\text{H}$  NMR spectrum of Ir1 in  $\text{DMSO}-d_6$ .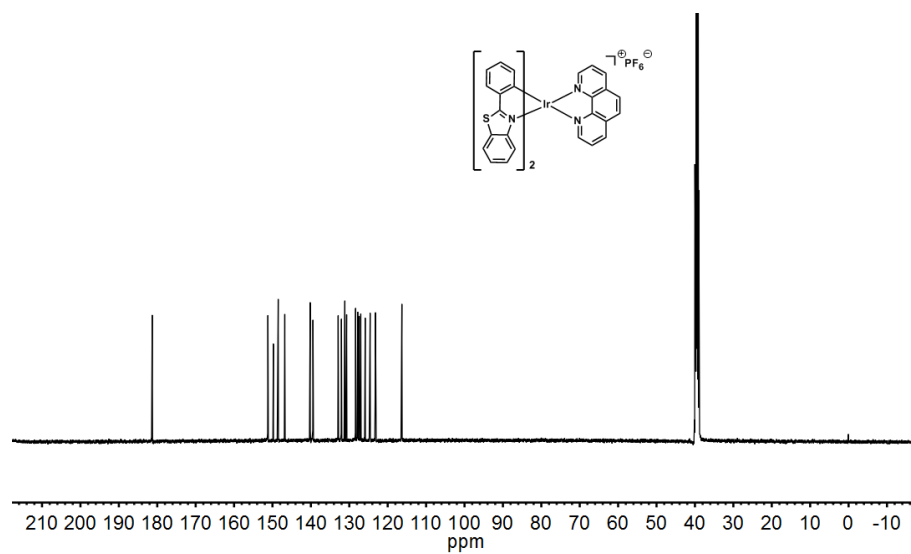Figure S7.  $^{13}\text{C}$  NMR spectrum of Ir1 in  $\text{DMSO}-d_6$ .



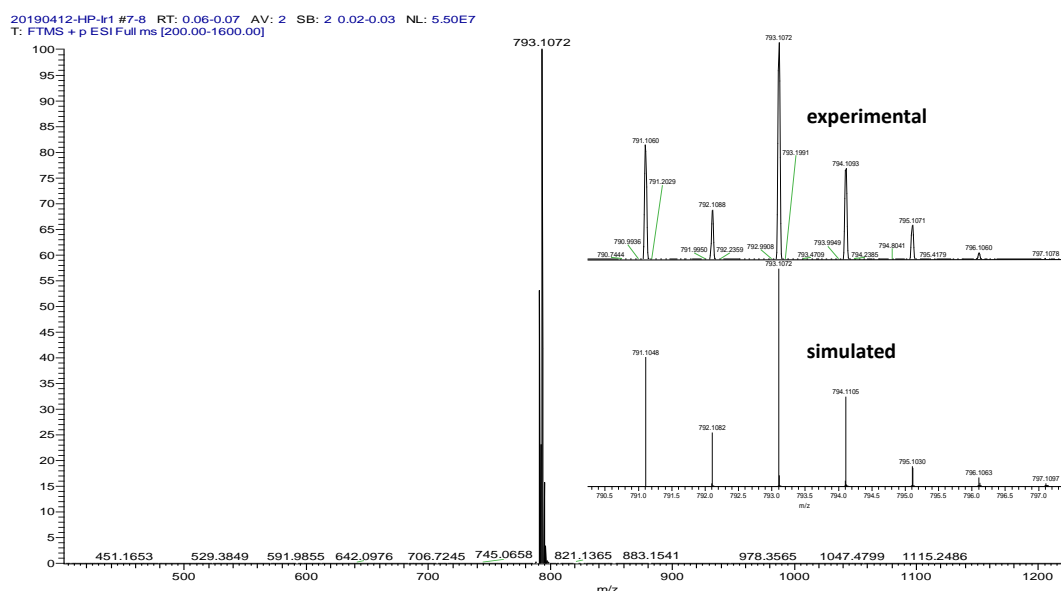

Figure S8. HRMS of the cationic portion of Ir1.

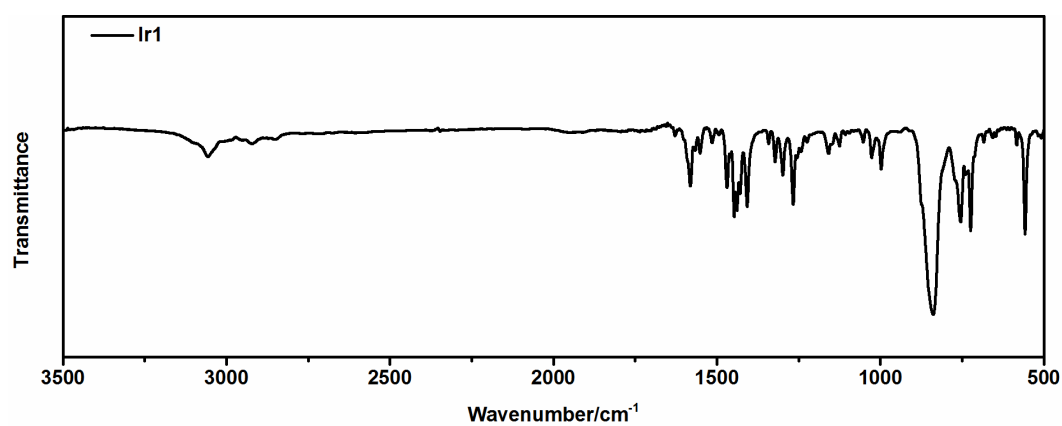

Figure S9. FT-IR spectrum of Ir1.

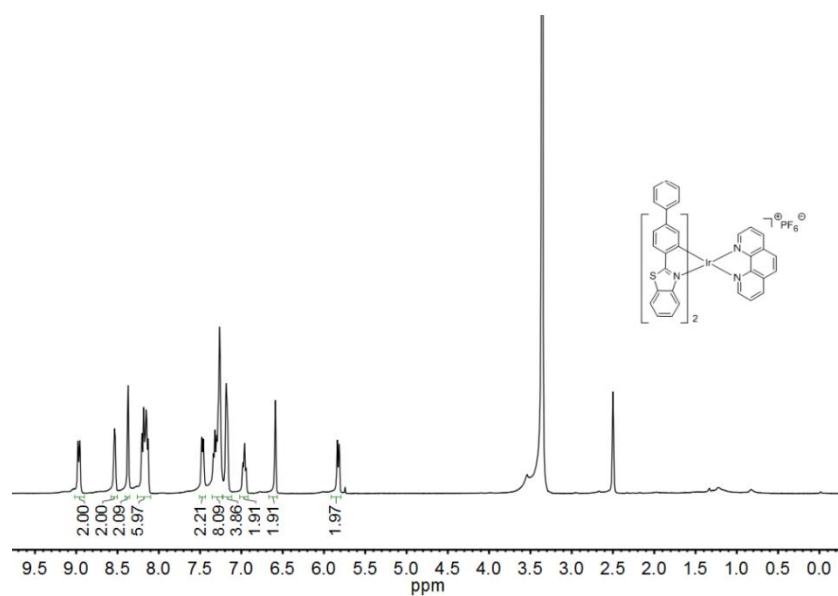Figure S10.  $^1\text{H}$  NMR spectrum of Ir2 in  $\text{DMSO}-d_6$ .

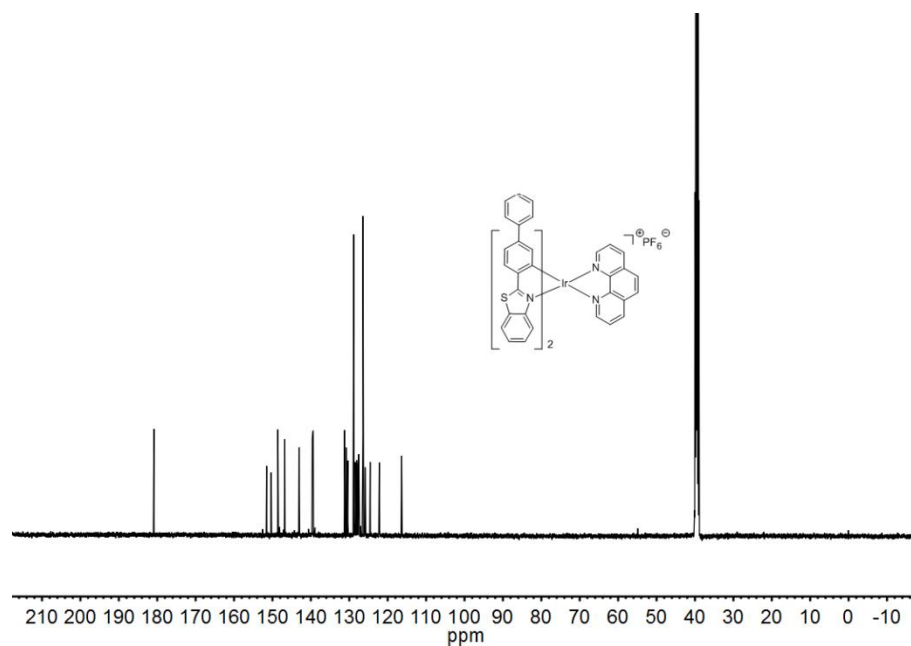

Figure S11.  $^{13}\text{C}$  NMR spectrum of **Ir2** in  $\text{DMSO}-d_6$ .

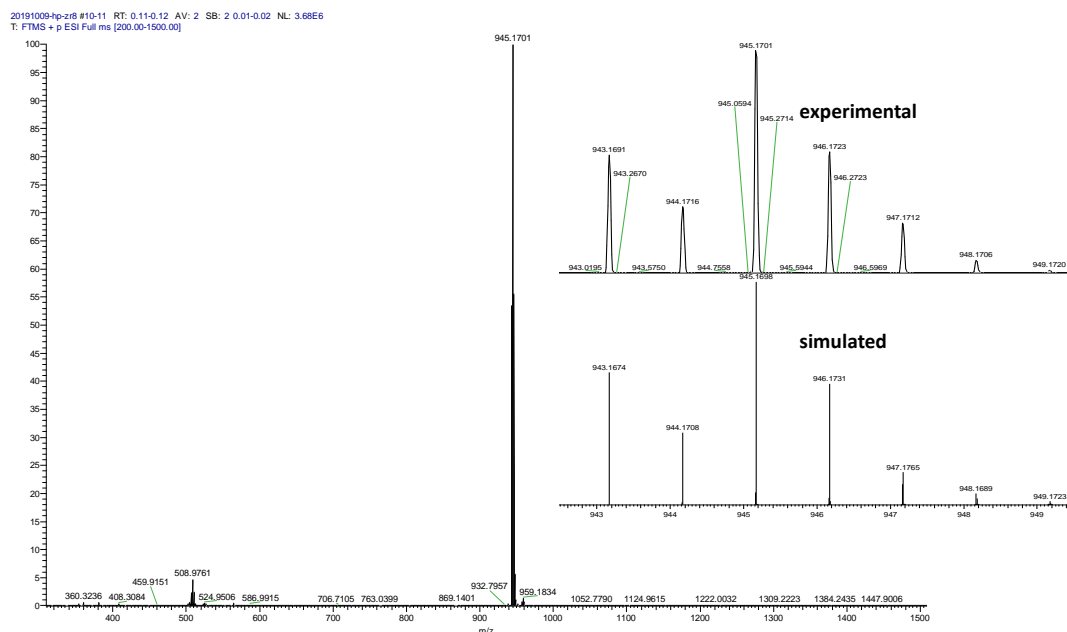

Figure S12. HRMS of cationic portion of **Ir2**.

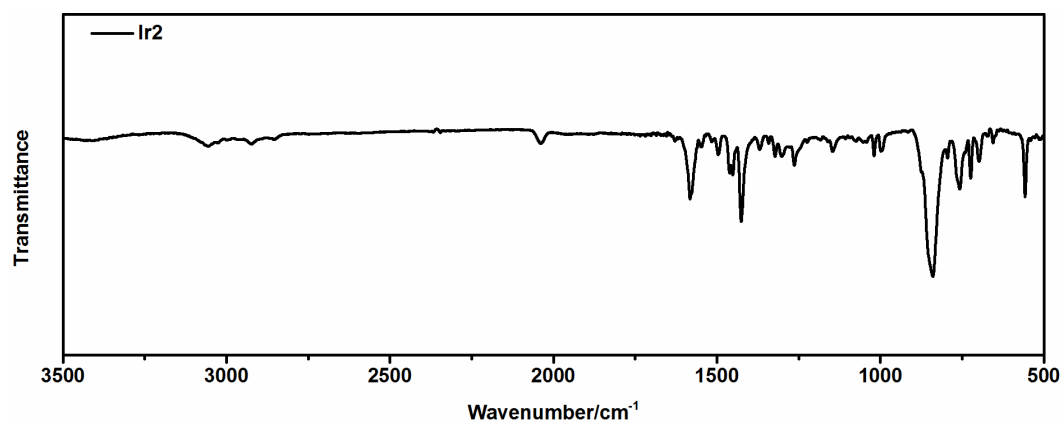

Figure S13. FT-IR spectrum of Ir2.

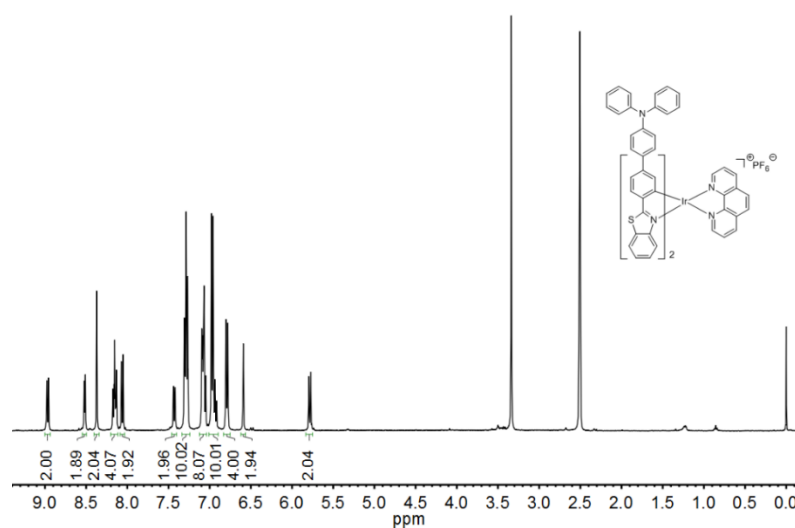Figure S14. <sup>1</sup>H NMR spectrum of Ir3 in DMSO-*d*<sub>6</sub>.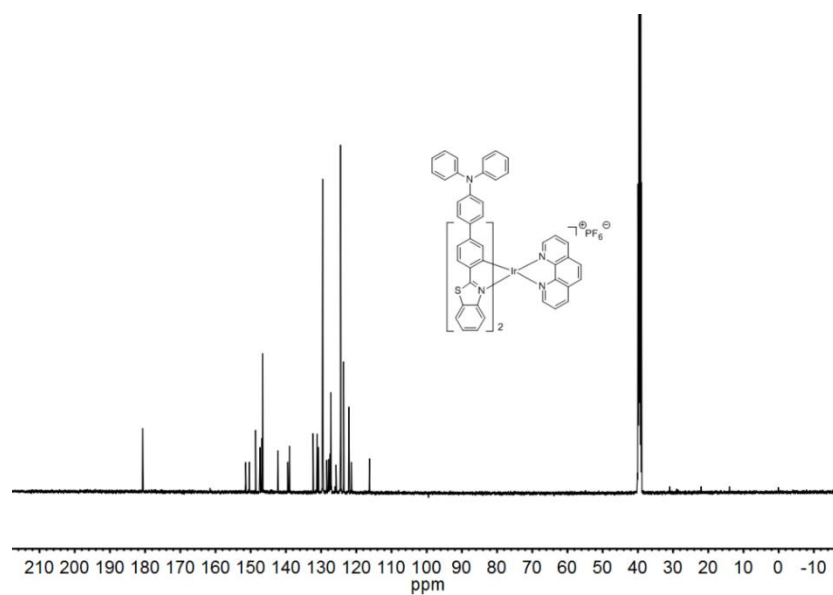Figure S15. <sup>13</sup>C NMR spectrum of Ir3 in DMSO-*d*<sub>6</sub>.

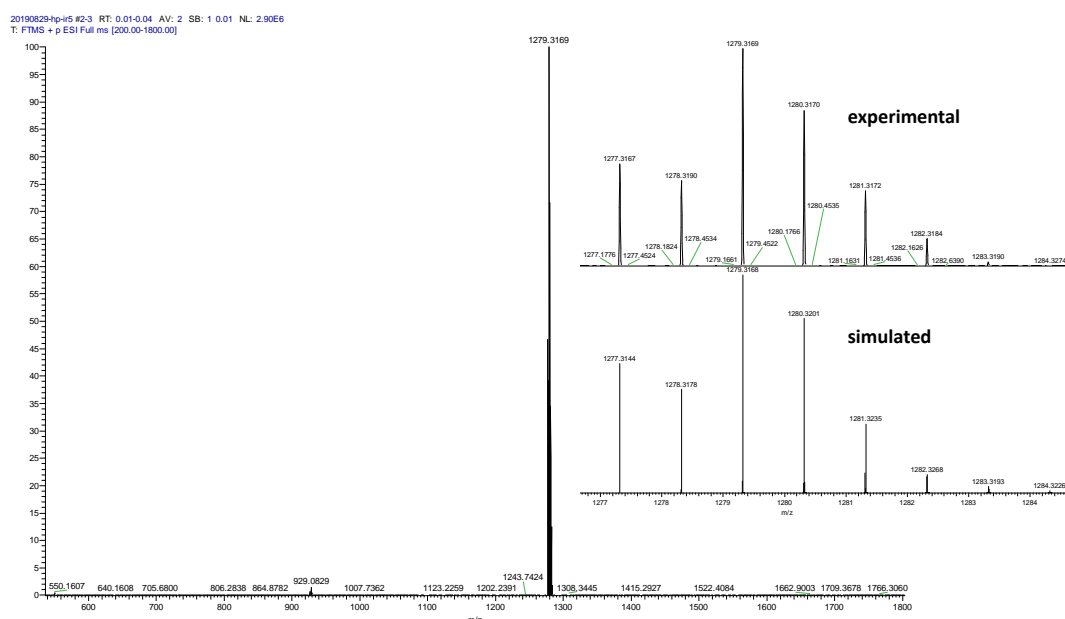

Figure S16. HRMS of cationic portion of Ir3.

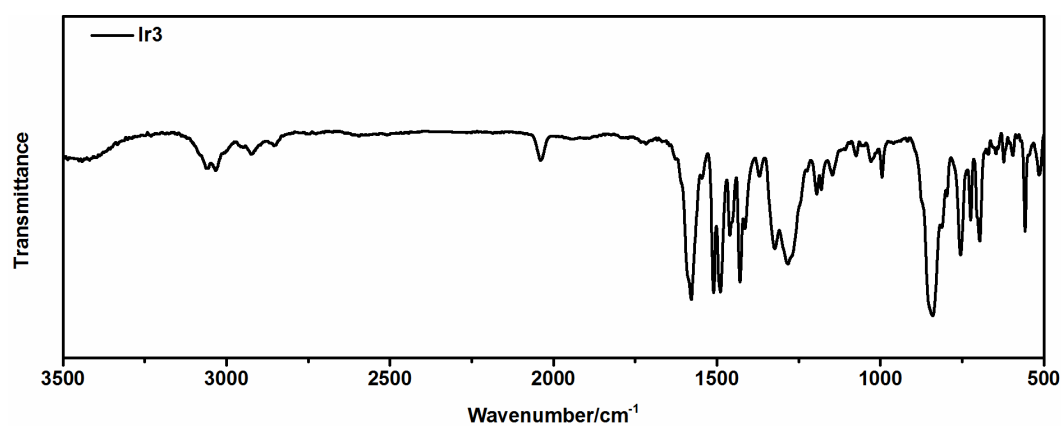

Figure S17. FT-IR spectrum of Ir3.

## References

1. Alam, P.; Kaur, G.; Kachwal, V.; Gupta, A.; Roy Choudhury, A.; Laskar, I.R. Highly sensitive explosive sensing by “aggregation induced phosphorescence” active cyclometalated iridium(III) complexes. *J. Mater. Chem. C* **2015**, *3*, 5450–5456. <https://doi.org/10.1039/C5TC00963D>.
2. Wen, L.-L.; Hou, X.-G.; Shan, G.-G.; Song, W.-L.; Zhang, S.-R.; Sun, H.-Z.; Su, Z.-M. Rational molecular design of aggregation-induced emission cationic Ir(III) phosphors achieving supersensitive and selective detection of nitroaromatic explosives. *J. Mater. Chem. C* **2017**, *5*, 10847–10854. <https://doi.org/10.1039/C7TC03535G>.
3. Hou, X.-G.; Wu, Y.; Cao, H.-T.; Sun, H.-Z.; Li, H.-B.; Shan, G.-G.; Su, Z.-M. A cationic iridium(III) complex with aggregation-induced emission (AIE) properties for highly selective detection of explosives. *Chem. Commun.* **2014**, *50*, 6031–6034. <https://doi.org/10.1039/C3CC49395D>.
4. Che, W.; Li, G.; Liu, X.; Shao, K.; Zhu, D.; Su, Z.; Bryce, M.R. Selective sensing of 2,4,6-trinitrophenol (TNP) in aqueous media with “aggregation-induced emission enhancement” (AIEE)-active iridium(III) complexes. *Chem. Commun.* **2018**, *4*, 1730–1733. <https://doi.org/10.1039/C7CC08832A>.
5. Sathiyar, G.; Balasubramaniam, B.; Ranjan, S.; Chatterjee, S.; Sen, P.; Garg, A.; Gupta, R.; Singh, A. A novel star-shaped triazine-triphenylamine-based fluorescent chemosensor for the selective detection of picric acid. *Mater. Today Chem.* **2019**, *12*, 178–186. <https://doi.org/10.1016/j.mtchem.2019.01.002>.

6. Verbitskiy, E.V.; Kvashnin, Y.A.; Baranova, A.A.; Khokhlov, K.O.; Chuvashov, R.D.; Schapov, I.E.; Yakovleva, Y.A.; Zhilina, E.F.; Shchepochkin, A.V.; Makarova, N.I.; et al. Synthesis and characterization of linear 1,4-diazine-triphenylamine-based selective chemosensors for recognition of nitroaromatic compounds and aliphatic amines. *Dyes Pigm.* **2020**, *178*, 108344. <https://doi.org/10.1016/j.dyepig.2020.108344>.
7. Zhang, H.-J.; Tian, Y.; Tao, F.-R.; Yu, W.; You, K.-Y.; Zhou, L.-R.; Su, X.; Li, T.-D.; Cui, Y.-Z. Detection of nitroaromatics based on aggregation induced emission of barbituric acid derivatives. *Spectrochim. Acta Part A* **2019**, *222*, 117168. <https://doi.org/10.1016/j.saa.2019.117168>.

**Disclaimer/Publisher's Note:** The statements, opinions and data contained in all publications are solely those of the individual author(s) and contributor(s) and not of MDPI and/or the editor(s). MDPI and/or the editor(s) disclaim responsibility for any injury to people or property resulting from any ideas, methods, instructions or products referred to in the content.
